# Supplementary material for: Variations of circulating cardiac biomarkers during and after anthracycline-containing chemotherapy in breast cancer patients
Source: BMC Cancer. 2018 Jan 29;18:102. doi: 10.1186/s12885-018-4015-4 (PMC5789542; doi:10.1186/s12885-018-4015-4)
Supplement: Additional file 1: — Statistical analyses. (A) Correlations Spearman tests between the fold change of cTnT, NT-proBNP, sST2, miR-126-3p, miR-199a-3p, miR-423-5p and miR-34a-5p at different time point of the neoadjuvant chemotherapy in 45 breast cancer patients. (B) Comparison between the increase of the markers at the end of the chemotherapy (NA1 vs. D8 and NA1 vs. 3 M) in patients treated (n = 17) or not (n = 28) with HER2 targeted therapy, using Mann-Whitney tests. (XLSX 50 kb) [file 12885_2018_4015_MOESM1_ESM.xlsx]

## Sheet: Feuil1
Correlations fold change NA1 - NA2 in breast cancer patients (n = 45)	p-value	r		Correlations fold change NA1 - D8 in breast cancer patients (n = 45)	p-value	r		Correlations fold change NA1 - 3M in breast cancer patients (n = 45)	p-value	r
cTnT and NT-proBNP	0.1129	0.2396		cTnT and NT-proBNP	0.0014	0.4623		cTnT and NT-proBNP	0.077	0.2663
cTnT and sST2	0.4911	-0.1053		cTnT and sST2	0.0008	0.4802		cTnT and sST2	0.3692	0.1371
NT-proBNP and sST2	0.338	0.1462		NT-proBNP and sST2	0.1147	0.2384		NT-proBNP and sST2	0.8562	0.0278
miR-126-3p and cTnT	0.1141	0.1141		miR-126-3p and cTnT	0.3746	0.1355		miR-126-3p and cTnT	0.3694	0.1387
miR-126-3p and NT-proBNP	0.3951	0.1299		miR-126-3p and NT-proBNP	0.5789	0.08497		miR-126-3p and NT-proBNP	0.0962	0.254
miR-126-3p and sST2	0.8582	0.0274		miR-126-3p and sST2	0.963	0.007115		miR-126-3p and sST2	0.6253	-0.07569
miR-199a-3p and cTnT	0.7342	0.05205		miR-199a-3p and cTnT	0.0354	0.3144		miR-199a-3p and cTnT	0.8107	0.03718
miR-199a-3p and NT-proBNP	0.6896	0.0612		miR-199a-3p and NT-proBNP	0.2852	0.1628		miR-199a-3p and NT-proBNP	0.2879	0.1638
miR-199a-3p and sST2	0.2145	0.1887		miR-199a-3p and sST2	0.1648	0.2107		miR-199a-3p and sST2	0.8537	0.02861
miR-423-5p and cTnT	0.4277	0.1212		miR-423-5p and cTnT	0.4203	0.1231		miR-423-5p and cTnT	0.3743	-0.1356
miR-423-5p and NT-proBNP	0.8503	-0.02895		miR-423-5p and NT-proBNP	0.7292	0.05307		miR-423-5p and NT-proBNP	0.2527	0.1741
miR-423-5p and sST2	0.9918	-0.001581		miR-423-5p and sST2	0.7701	0.0448		miR-423-5p and sST2	0.0491	-0.2951
miR-34a-5p and cTnT	0.1348	0.2264		miR-34a-5p and cTnT	0.5007	-0.103		miR-34a-5p and cTnT	0.6665	-0.06604
miR-34a-5p and NT-proBNP	0.5935	0.08174		miR-34a-5p and NT-proBNP	0.9083	0.01767		miR-34a-5p and NT-proBNP	0.2118	0.1898
miR-34a-5p and sST2	0.4348	-0.1194		miR-34a-5p and sST2	0.5961	-0.08116		miR-34a-5p and sST2	0.9514	-0.009354
Comparaison fold change in patients with (n = 11) vs without (n = 36) HER2 targeted therapy	NA1 - D8 (p-value)	NA1 - 3M (p-value)
cTnT	0.9217	0.9786
NT-proBNP	0.7019	0.2
sST2	0.4319	0.9744
miR-126-3p	0.8036	0.1023
miR-199a-3p	0.8644	0.1823
miR-423-5p	0.2945	0.0642
miR-34a-5p	0.1519	0.8512
